# Supplementary material for: Glis family proteins are differentially implicated in the cellular reprogramming of human somatic cells
Source: PubMed Central journal article supplement (PMC5652762; doi:10.18632/oncotarget.20334), 2017-08-18
Supplement: oncotarget-08-77041-s001.pdf [file oncotarget-08-77041-s001.pdf]

# Glis family proteins are differentially implicated in the cellular reprogramming of human somatic cells

## SUPPLEMENTARY MATERIALS

A

# Identity:  
198/678 (29.2%)  
# Similarity:  
256/678 (37.8%)

Red:  
Identical amino acid  
Blue:  
Similar amino acid

|             |     |                                                     |     |
|-------------|-----|-----------------------------------------------------|-----|
| Human Glis1 | 1   | -----MAEARTSLSAHCRGPLATGLHPDLDL-----                | 50  |
| Human Glis2 | 1   | MHSLDEPLDLKLSITKLRAREKRERTLGVVRPRA--LHRELGLVDDSP    | 50  |
| Human Glis1 | 51  | PGRSLATPAPSCYLLGSE-----PSSGLGLQETHL--PEGSL          | 100 |
| Human Glis2 | 51  | PG-SPGSP-PSGFLNLSKFPKVEGRFSAPLVDLSLSPSGLDSPNGS-     | 100 |
| Human Glis1 | 101 | KRCCVLGLPPTSPASSPCASSDVFSIIRSSQTSLVTCVNGLRSP----    | 150 |
| Human Glis2 | 101 | -----SLSPERQNGDLPPVPSASDFQPLRYLDGVFSSFFQFFL         | 150 |
| Human Glis1 | 151 | PLTGDLDGSPSKRARPGPASTDSHEGSLQLEACRKAFLKQEPADFSELF   | 200 |
| Human Glis2 | 151 | PL-----GSGGALHL-----PASSF--LT                       | 200 |
| Human Glis1 | 201 | GPHQQLFPYPLSQLPPGPSLGGGLGLAGRVVAGRQACRWVDCCAAYE     | 250 |
| Human Glis2 | 201 | PKDKCLSPDLPLPK-----QLVCRWAKCNQLFE                   | 250 |
| Human Glis1 | 251 | QEEIVRHIKESHIDQRKGEDFTCFWAGCVRYKPFNARYKLLIHMVHS     | 300 |
| Human Glis2 | 251 | LLQDLVDHVNDYHVKPEKDAGYCCWEGCARHGFRNARYKMLIHIRTHT    | 300 |
| Human Glis1 | 301 | EKPNCMFEGCSKAFSRLENLKIHLRSHTGKPYLCQHPGCQKAFSNS      | 350 |
| Human Glis2 | 301 | NEKPHRC--PTCSKFSRLENLKIHLRSHTGKPYVCPYEGCNKRYSNS     | 350 |
| Human Glis1 | 351 | DRAKHQRTHLDTKPYACQIPGCSKRYTDPSSLRKHVKAH---AEEQVR    | 400 |
| Human Glis2 | 351 | DRFKHTRTHYVDKPYCKMPGCHKRYTDPSSLRKHVKAHSHFVSHQQEL    | 400 |
|             |     | DNA binding domain                                  |     |
| Human Glis1 | 401 | KKLHAGPDEADVLTCLVQLHTSTQLAASDGKGGGGLGQELLPGVYP      | 450 |
| Human Glis2 | 401 | LQLRPPP-----KPELPAPDGGPYVSGAQIIPN--P                | 450 |
| Human Glis1 | 451 | GSIPTPHNGLASGLLPAAHDVPSRHHPLDATTSSHHLSPLMAESTRDGL   | 500 |
| Human Glis2 | 451 | AALFGGPGGL-----PGLPLAPGLD-----LSALACGNGGGG-         | 500 |
| Human Glis1 | 501 | GPGLLSPIVSPKGLGPPPLPSSQSHSPGGQPFPTLPKPSYPPFQSP      | 550 |
| Human Glis2 | 501 | GCG-----GMGP-----GLPGPVLPLNLAKNPL----               | 550 |
| Human Glis1 | 551 | PPPLPSPQGYQGSFHSIQSCFFPYGDCYRMAEP AAGDGLVGETHGFNPLR | 600 |
| Human Glis2 | 551 | --LPSPFAGGGLLPVVS-----LLAGAAGGKAEGEKRGVPTR          | 600 |
| Human Glis1 | 601 | PNGYHSLSTPLPATGYEALAEASC---PTALPQQPSEIV-VSSGPEDCG   | 650 |
| Human Glis2 | 601 | ALGMEGHKTPLERT-----ESSCSRPSPDGLPLLPGTVLDLSTGVNSAA   | 650 |
| Human Glis1 | 651 | FFPNGAFDHCL---GHI---PSIYTD                          | 678 |
| Human Glis2 | 651 | SSPEALAPGWVIPPGSVLLKPAVNVN--                        | 678 |

Supplementary Figure 1: The comparison of amino acid sequences between hGlis1 and hGlis2, and between hGlis1 and hGlis2. (A) Amino acid sequence alignment between hGlis1 and hGlis2.

B

# Identity :  
295/819 (36.0%)  
# Similarity :  
351/819 (42.9%)

Red:  
Identical amino acid  
Blue:  
Similar amino acid

|               |     |                                                      |     |
|---------------|-----|------------------------------------------------------|-----|
| Human Glis1   | 1   | -----                                                | 50  |
| Human Glis3v2 | 1   | MMVQRLGLISPPASQVSTACNQISPSLQRAMAANLNIPPSDTRSLISRE    | 50  |
| Human Glis1   | 51  | -----MAEARTSLSAHCRGGLATGLHFDLDL                      | 100 |
| Human Glis3v2 | 51  | SLASTTSLTESQGSASSMKQEQSYRALFSLSNH-----GSQNGLDL       | 100 |
| Human Glis1   | 101 | -----PGRSLATPAPS---CYLLGSEFSSGLGLQP---ETHLPEG        | 150 |
| Human Glis3v2 | 101 | GDLLSLPFGTSMSSNSVNSLPSYLFGTESSHSPYSPRHSSTRSHSAR-     | 150 |
| Human Glis1   | 151 | SLKRCCVLLGLPPTSASSSPCASSDVTSIIRSSQTSVLVTCVNGLRSEPP-- | 200 |
| Human Glis3v2 | 151 | SKKR--ALSLPLSDG----IGIDFNTIIRTSPTSLVAYINGSRASPAN     | 200 |
| Human Glis1   | 201 | -----LTGDLGGPSKRARPSPASTDS---HEGSLQLLEACRKASFL       | 250 |
| Human Glis3v2 | 201 | LSPQPEVYGHFLGVRGSCIPFRPVPSQKGLVAPGGLALPAGYEDGAL      | 250 |
| Human Glis1   | 251 | KQEPADSEFSE-----LFGPHQGS-----                        | 300 |
| Human Glis3v2 | 251 | BHERMQLEHGGLPGLVNHMVVQHGLFGPDSQSAGLFKTERLEEFPGST     | 300 |
| Human Glis1   | 301 | --LPPPYPLSQLPP-----GPSLGGGLGLA----                   | 350 |
| Human Glis3v2 | 301 | VDLPPAPLPPPPPGPPPYHAHAHLHPHLPGLPQAQALPQAFLDDD        | 350 |
| Human Glis1   | 351 | GRV--VAGRQCRWVDCAAAYEQEELVRHIEKSHIDQRKGEDFTCFWAG     | 400 |
| Human Glis3v2 | 351 | GEMDGIQGGKRCRWIDCSALYDQEEELVRHIEKSHIDQRKGEDFTCFWAG   | 400 |
| Human Glis1   | 401 | CVRRYKPFNARYKLLIHMVHSGEKPNCMFEGC-KAFSRLENLKIHLRS     | 450 |
| Human Glis3v2 | 401 | CPRRYKPFNARYKLLIHMVHSGEKPNCIFEGC-KAFSRLENLKIHLRS     | 450 |
| Human Glis1   | 451 | HTGKPYLCQHPCQKAFSNSSDRAKHQRTHLDTKPYACQIPGCKRYTD      | 500 |
| Human Glis3v2 | 451 | HTGKPYLCQHPCQKAFSNSSDRAKHQRTHLDTKPYACQIPGCKRYTD      | 500 |
| Human Glis1   | 501 | -----DNA binding domain                              | 550 |
| Human Glis1   | 501 | PSSLRKHVKAHSAKEQQVRKKLHAGPDTEADVLTCLVQLH--TSTQL      | 550 |
| Human Glis3v2 | 501 | PSSLRKHVKAHSSKEQQVRKKLRSSTELHFDLLTDCLVQSLQPATSFHD    | 550 |
| Human Glis1   | 551 | AASDGKGGCGLGQELLPG-----VYFGSITPHNGLASGLLPPAHV--      | 600 |
| Human Glis3v2 | 551 | AAAEGETVGRSPG---PGPDLYSAPIFSSNYSSRSGTAAGAVPPHPEVSH   | 600 |
| Human Glis1   | 601 | PSRHPLDATTSSH--HLSPLPMAESTRDGLGGLLSP-IVSPLKGLG       | 650 |
| Human Glis3v2 | 601 | PSPGHNVQG--SPHNPSQLPPLTAVDAGAEERFAPSAPHHSRVRVPA      | 650 |
| Human Glis1   | 651 | PPPL----PPSQ---SHSPGGQFPPTLPSKPS-----YPPFQSP         | 700 |
| Human Glis3v2 | 651 | PSSLLQRTQPPYTQQPSGSHLKSYPQETNSSFPQNGIHVHGFYGLQKFC    | 700 |
| Human Glis1   | 701 | PPPLPSPQYQGSFHSIQSCFFYDCYRMAEPAGGDLVGETHGFNPLR       | 750 |
| Human Glis3v2 | 701 | PPHYPDSQRIVPPVSSCSVVPSFEDC---LVPTSMGQASFDVH-----     | 750 |
| Human Glis1   | 751 | PNGYHSLSTPLPATGYEALAEASCPALPQQPSE---DVSVSGPEDCGFF    | 800 |
| Human Glis3v2 | 751 | ---RAFSTHSGITVYD-----LPSSSSSLFGESLRSAGAEATFL         | 800 |
| Human Glis1   | 801 | PNGAFDHCGLGHIFSIYTD                                  | 819 |
| Human Glis3v2 | 801 | QISTVDRCPSSLVYTEG                                    | 819 |

Supplementary Figure 1 (Continued): (B) Amino acid sequence alignment between hGlis1 and hGlis3v2.

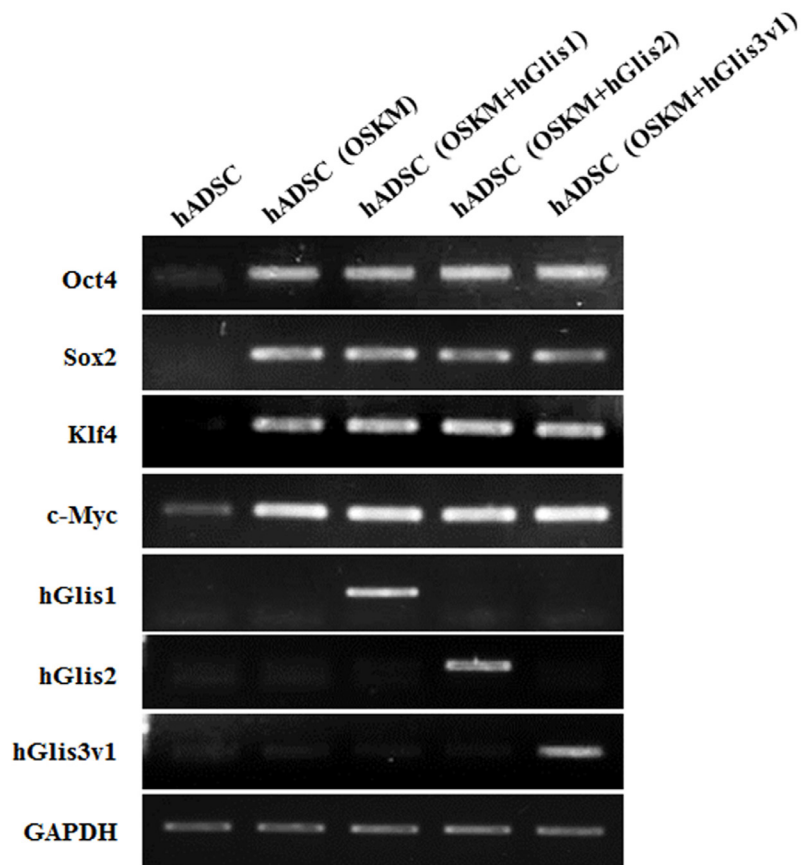

**Supplementary Figure 2: RT-PCR analysis of the expression of several reprogramming genes and Glis family genes.** hADSCs were transduced with retroviral vectors carrying several reprogramming genes and Glis family genes, and the expression levels of the genes were examined 70 hours after transduction.

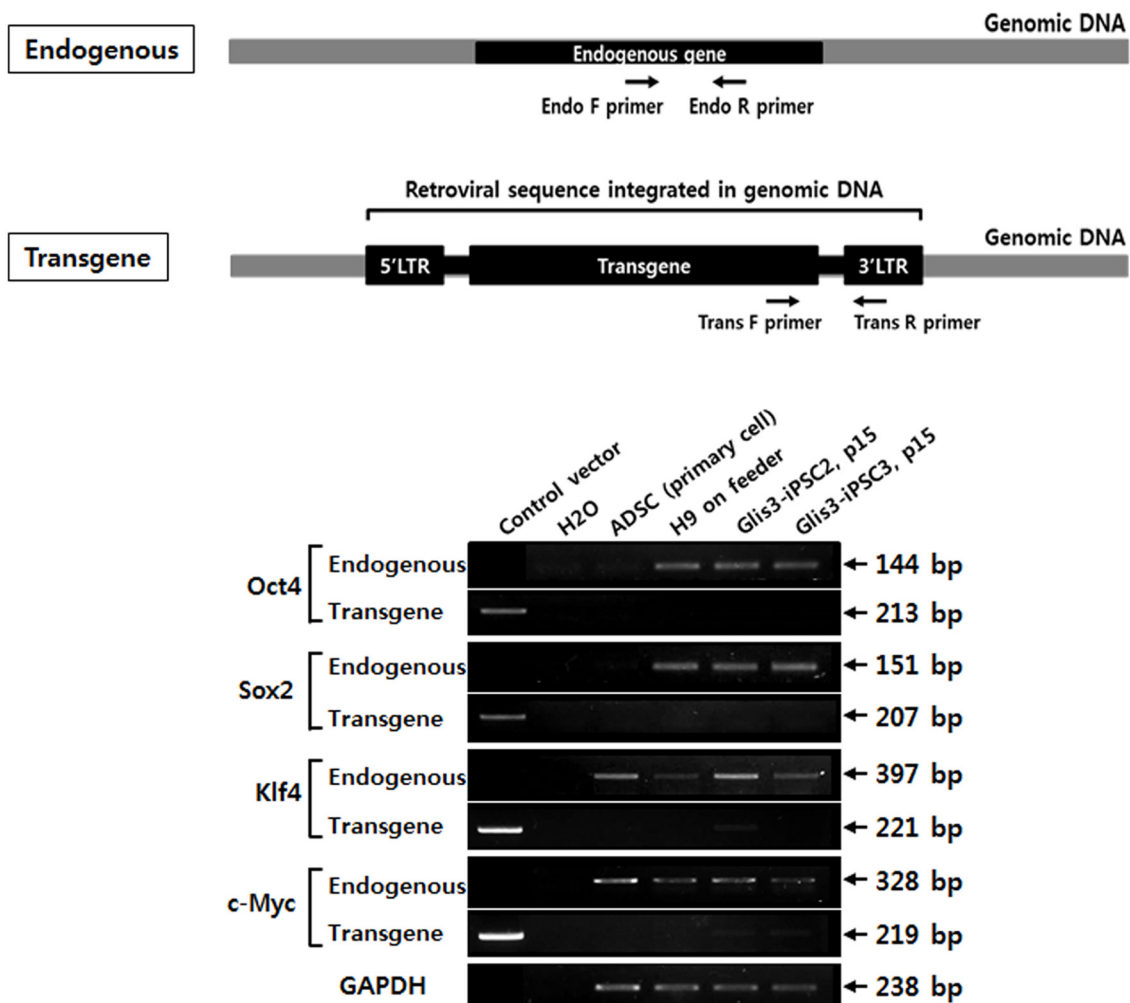

Supplementary Figure 3: RT-PCR shows the expression of exogenous and endogenous reprogramming genes in hADSCs, hESCs, and Glis3-iPSCs.

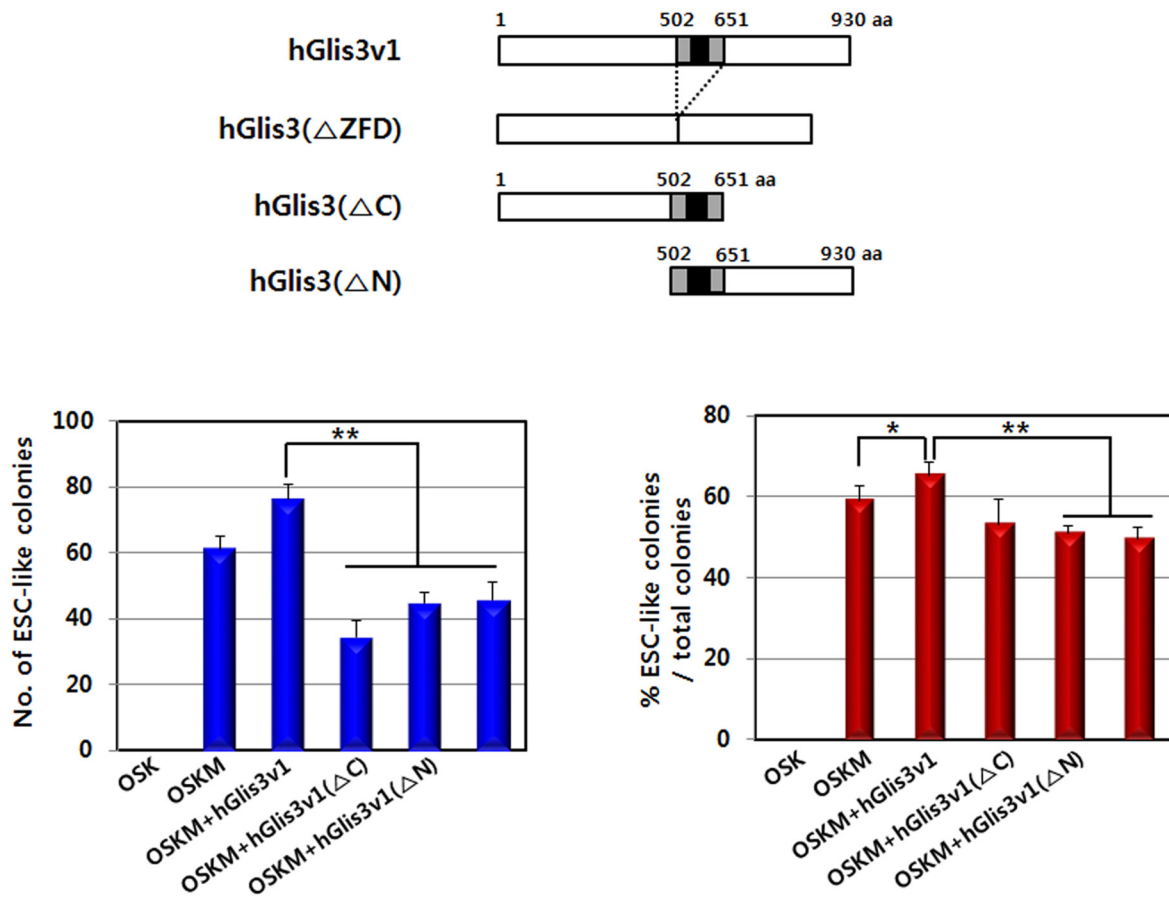

Supplementary Figure 4: Gene constructs for several truncated forms of hGlis3 proteins were generated and examined for their activities in promoting reprogramming efficiency. n=3, \* $p < 0.05$  \*\* $p < 0.01$ .

**Supplementary Table 1: List of the primer pairs used for the qRT-PCR and bisulfite sequencing analyses**

| Experiments                 | Gene                 | Forward primer (5' - 3')      | Reverse primer (5' - 3')       |
|-----------------------------|----------------------|-------------------------------|--------------------------------|
|                             | Human Glis1          | CACCAATAGTCAGCCCCCTG          | GGCTCTGGAAGGGTGGGTAG           |
|                             | Human Glis2          | CATCCTGCGGACAGTTGTGG          | CCAGCCATGAATGACCTAGC           |
|                             | Human Glis3(v1+v2)   | GAAGTGCCAGATGTGAGAAC          | CAGACAGATGAGTGGATATC           |
|                             | Human Glis3v1        | CATCACATTCCTGCCATCCG          | CGTTGTTCTGAGGAGCCATC           |
|                             | Human $\beta$ -actin | ATCTGGCACACACCTTCTAC          | GCGTACAGGGTAGCACAGC            |
|                             | Human Oct4           | AGAAGAGGATCACCTGGGAT          | AGAACCACACTCGGACCACAT          |
|                             | Human Nanog          | CCTGAAGACGTGTGAAGATGAG        | GCTCATTAGGCTCCACCATAC          |
|                             | Human Sox2           | AGAAGAGGAGAGAGAAAGAAAGGGAGAGA | GAGAGAGGCCAAACTGGAATCAGGATCAAA |
|                             | Human DNMT3B         | GCTCACAGGGCCCGATACTT          | GCAGTCCTGCAGCTCGAGTTTA         |
| <b>qRT-PCR</b>              | Human Zic3           | CAAAGTGTGCGACAAGTCCTACA       | GGGAGGAATCTGACCCTTGAG          |
|                             | Human Rex1           | CAGATCCTAAACAGCTCGCAG         | GCGTACGCAAATTAAGTCCA           |
|                             | Human NCAM           | CACTATCTGGTCAGGTACCG          | CCGCCTTGGATTTTCCTTGC           |
|                             | Human Nestin         | GAGAGCGAGCAGGAGGAGTT          | GGAGTGGAGTCTGGAAGGGT           |
|                             | Human Pax6           | GCTTCACCATGGCAAATAACC         | GGCAGCATGCAGGAGTATGA           |
|                             | Human FoxF1          | CACCAGAACAGCCACAAC            | GCCATGGCGTTGAAAGAG             |
|                             | Human Hand1          | CACACTTGGATCGCACGT            | GACAGTCCCTCCTTCTTG             |
|                             | Human Gata2          | CAGACGACAACCACCACCTTATG       | TGGTCAGTGGCCTGTAAACATTG        |
|                             | Human AFP            | TTGGGCTGCTCGCTATG             | TTTGTAAGTGTGCTGCCTTTG          |
|                             | Human Gata6          | TCCAGAAGCCAGGACTAGGA          | TCCATGAACGCACATGAAAT           |
| <b>Bisulfite sequencing</b> | Human Oct4           | GGATGTTATTAAGATGAAGATAGTTGG   | CCTAAACTCCCCTTCAAAATCTATT      |
|                             | Human Nanog          | AGAGATAGGAGGGTAAGTTTTTTTT     | ACTCCACACAAACTAAGTTTATTTC      |

**Supplementary Table 2: List of the antibodies used in this study**

| <b>antibody (Host)</b>   | <b>Company</b> | <b>Cat. No</b> | <b>Dilution</b> |
|--------------------------|----------------|----------------|-----------------|
| Oct4 (Mouse)             | Santa Cruz     | sc-5279        | 1:500           |
| Sox2 (Rabbit)            | Cell signaling | 3579           | 1:500           |
| SSEA4 (Mouse)            | Millipore      | MAB4304        | 1:500           |
| Tra1-60 (Mouse)          | Millipore      | MAB4360        | 1:500           |
| Tra1-81 (Mouse)          | Millipore      | MAB4381        | 1:500           |
| Nestin (Mouse)           | Millipore      | MAB5326        | 1:200           |
| Tuj1 (Mouse)             | Covance        | MMS-435P       | 1:200           |
| SMA (Mouse)              | AbFrontier     | YF-PA23164     | 1:200           |
| PECAM (Mouse)            | Millipore      | MAB1393        | 1:200           |
| AFP (Mouse)              | Abcam          | Ab3980         | 1:200           |
| FoxA2 (Mouse)            | AbFrontier     | YF-MA10439     | 1:200           |
| Alexa Fluor 594 (Mouse)  | Invitrogen     | A-11005        | 1:500           |
| Alexa Fluor 594 (Rabbit) | Invitrogen     | A-11012        | 1:500           |
| Alexa Fluor 488 (Mouse)  | Invitrogen     | A-11001        | 1:500           |
| Alexa Fluor 488 (Rabbit) | Invitrogen     | A-11008        | 1:500           |

**Supplementary Table 3: List of the primer pairs used for RT-PCR analysis to distinguish the endogenous and transgene expression of the four Yamanaka reprogramming genes**

| Experiments             | Gene             | Forward primer (5' - 3')    | Reverse primer (5' - 3')     |
|-------------------------|------------------|-----------------------------|------------------------------|
| Semiquantitative RT-PCR | Endogenous Oct4  | GACAGGGGGAGGGGAGGAGCTAGG    | CTTCCCTCCAACCAGTTGCCCAAAC    |
|                         | Endogenous Sox2  | GGGAAATGGGAGGGGTGCAAAAGAGG  | TTGCGTGAGTGTGGATGGGATTGGTG   |
|                         | Endogenous Klf4  | ACGATCCTGGCCCCGAAAAGGACC    | TGATTGTAGTGCTTTCTGGCTGGGCTCC |
|                         | Endogenous c-Myc | GCGTCCTGGGAAGGGAGATCCGGAGC  | TTGAGGGGCATCGTCGCGGGAGGCTG   |
|                         | Transgene Oct4   | CCCCAGGGCCCCATTTTGGTACC     | ATTTTATCGTCGACCACTGTGCTG     |
|                         | Transgene Sox2   | GGCACCCCTGGCATGGCTCTTGGGTC  | ATTTTATCGTCGACCACTGTGCTG     |
|                         | Transgene Klf4   | ACGATCCTGGCCCCGAAAAGGACC    | ATTTTATCGTCGACCACTGTGCTG     |
|                         | Transgene c-Myc  | CAACAACCCAAAATGCACCAGCCCCAG | ATTTTATCGTCGACCACTGTGCTG     |



Supplementary Table 4: DNA fingerprint analysis

| Locus/sample | ADSC     | Glis3-iPSC2(OSKM+hGlis3) |
|--------------|----------|--------------------------|
| D8S1179      | 10, 13   | 10, 13                   |
| D21S11       | 31, 33.2 | 31, 33.2                 |
| D7S820       | 9, 11    | 9, 11                    |
| CSF1PO       | 11, 11   | 11, 11                   |
| D3S1358      | 15, 17   | 15, 17                   |
| TH01         | 7, 9     | 7, 9                     |
| D13S317      | 8, 11    | 8, 11                    |
| D16S539      | 9, 10    | 9, 10                    |
| D2S1338      | 20, 20   | 20, 20                   |
| D19S433      | 14, 14   | 14, 14                   |
| vWA          | 18, 18   | 18, 18                   |
| TPOX         | 8, 11    | 8, 11                    |
| D18S51       | 13, 16   | 13, 16                   |
| D5S818       | 11, 11   | 11, 11                   |
| FGA          | 22, 25   | 22, 25                   |

**Supplementary Table 5: List of the hESC-enriched genes**

See Supplementary File 1

**Supplementary Table 6: List of the hADSC-enriched genes**

See Supplementary File 1
